# Supplementary material for: Sustainable Working Life Patterns in a Swedish Twin Cohort: Age-Related Sequences of Sickness Absence, Disability Pension, Unemployment, and Premature Death during Working Life
Source: MDPI journal article supplement (doi:10.3390/ijerph191710549), 2022-08-24
Supplement: s1 [file s1]

**Table S1.** Conditional odds ratios (OR) with 95% confidence intervals (CI) for associations between sociodemographic factors and sequence clusters among monozygotic (MZ) and dizygotic (DZ) twins in the age cohort 26-35 years.

| 26-35 years old MZ twins                       |                 |                    |                 |            |                 |            |                 |                   |                 |            |                 |                   |  |
|------------------------------------------------|-----------------|--------------------|-----------------|------------|-----------------|------------|-----------------|-------------------|-----------------|------------|-----------------|-------------------|--|
|                                                | Cluster group 1 |                    | Cluster group 2 |            | Cluster group 3 |            | Cluster group 4 |                   | Cluster group 5 |            | Cluster group 6 |                   |  |
|                                                | (n = 310)       |                    | (n = 1504)      |            | (n = 1396)      |            | (n = 1990)      |                   | (n = 282)       |            | (n = 78)        |                   |  |
|                                                | OR              | 95% CI             | OR              | 95% CI     | OR              | 95% CI     | OR              | 95% CI            | OR              | 95% CI     | OR              | 95% CI            |  |
| Education level                                |                 |                    |                 |            |                 |            |                 |                   |                 |            |                 |                   |  |
| Elementary (≤9 years)                          | 1.00            | ref                | 1.00            | ref        | 1.00            | ref        | 1.00            | ref               | 1.00            | ref        | 1.00            | ref               |  |
| High school (10-12 years)                      | 1.13            | 0.43, 2.97         | 0.64            | 0.34, 1.22 | 1.36            | 0.77, 2.40 | 1.41            | 0.83, 2.41        | 0.56            | 0.19, 1.67 | na              | -                 |  |
| University/college (>12 years)                 | 1.12            | 0.26, 4.90         | 0.74            | 0.35, 1.54 | 1.02            | 0.53, 1.99 | 1.74            | 0.93, 3.25        | 0.52            | 0.12, 2.15 | na              | -                 |  |
| Degree of urbanization                         |                 |                    |                 |            |                 |            |                 |                   |                 |            |                 |                   |  |
| Cities (densely populated areas)               | 1.00            | ref                | 1.00            | ref        | 1.00            | ref        | 1.00            | ref               | 1.00            | ref        | 1.00            | ref               |  |
| Towns and suburbs (intermediate density areas) | 1.08            | 0.45, 2.59         | 1.37            | 0.96, 1.95 | 0.98            | 0.67, 1.45 | 0.82            | 0.60, 1.13        | 1.15            | 0.41, 3.23 | 0.20            | 0.02, 1.76        |  |
| Rural areas (thinly populated areas)           | <b>6.55</b>     | <b>1.20, 35.73</b> | 0.75            | 0.44, 1.29 | 1.01            | 0.61, 1.69 | 0.87            | 0.56, 1.33        | 2.75            | 0.77, 9.89 | 0.00            | 0.00, 0.00        |  |
| Married                                        |                 |                    |                 |            |                 |            |                 |                   |                 |            |                 |                   |  |
| No                                             | 1.00            | ref                | 1.00            | ref        | 1.00            | ref        | 1.00            | ref               | 1.00            | ref        | 1.00            | ref               |  |
| Yes                                            | 0.45            | 0.15, 1.34         | 1.10            | 0.61, 2.01 | 0.84            | 0.53, 1.32 | 1.25            | 0.79, 1.98        | 1.17            | 0.52, 2.63 | na              | -                 |  |
| 26-35 years old DZ twins                       |                 |                    |                 |            |                 |            |                 |                   |                 |            |                 |                   |  |
|                                                | Cluster group 1 |                    | Cluster group 2 |            | Cluster group 3 |            | Cluster group 4 |                   | Cluster group 5 |            | Cluster group 6 |                   |  |
|                                                | (n = 324)       |                    | (n = 1194)      |            | (n = 1048)      |            | (n = 1684)      |                   | (n = 266)       |            | (n = 112)       |                   |  |
| Education level                                |                 |                    |                 |            |                 |            |                 |                   |                 |            |                 |                   |  |
| Elementary (≤9 years)                          | 1.00            | ref                | 1.00            | ref        | 1.00            | ref        | 1.00            | ref               | 1.00            | ref        | 1.00            | ref               |  |
| High school (10-12 years)                      | 1.40            | 0.71, 2.73         | 0.68            | 0.44, 1.06 | 0.91            | 0.55, 1.48 | <b>1.83</b>     | <b>1.17, 2.84</b> | 2.13            | 0.98, 4.64 | <b>0.06</b>     | <b>0.01, 0.60</b> |  |
| University/college (>12 years)                 | 0.70            | 0.27, 1.85         | 0.87            | 0.52, 1.43 | 0.62            | 0.35, 1.10 | <b>2.82</b>     | <b>1.74, 4.57</b> | 0.41            | 0.15, 1.17 | na              | -                 |  |
| Degree of urbanization                         |                 |                    |                 |            |                 |            |                 |                   |                 |            |                 |                   |  |
| Cities (densely populated areas)               | 1.00            | ref                | 1.00            | ref        | 1.00            | ref        | 1.00            | ref               | 1.00            | ref        | 1.00            | ref               |  |
| Towns and suburbs (intermediate density areas) | 0.74            | 0.34, 1.63         | 1.02            | 0.71, 1.49 | 1.40            | 0.93, 2.10 | 0.95            | 0.70, 1.29        | 0.61            | 0.23, 1.59 | 0.52            | 0.09, 3.09        |  |
| Rural areas (thinly populated areas)           | 0.93            | 0.36, 2.45         | 1.12            | 0.67, 1.87 | 0.86            | 0.52, 1.44 | 1.02            | 0.69, 1.51        | 1.18            | 0.40, 3.41 | 1.11            | 0.10, 12.85       |  |
| Married                                        |                 |                    |                 |            |                 |            |                 |                   |                 |            |                 |                   |  |
| No                                             | 1.00            | ref                | 1.00            | ref        | 1.00            | ref        | 1.00            | ref               | 1.00            | ref        | 1.00            | ref               |  |
| Yes                                            | 0.50            | 0.19, 1.29         | 1.25            | 0.79, 1.98 | 0.82            | 0.50, 1.34 | 1.08            | 0.72, 1.63        | 1.77            | 0.65, 4.80 | na              | -                 |  |

na = not able to be assessed due to low number of individuals.

**Table S2.** Conditional odds ratios (OR) with 95% confidence intervals (CI) for associations between sociodemographic factors and sequence clusters among monozygotic (MZ) and dizygotic (DZ) twins in the age cohort 36-45 years.

| 36-45 years old MZ twins                       |                 |                   |                 |                   |                 |            |                 |                   |                 |                   |                 |                   |
|------------------------------------------------|-----------------|-------------------|-----------------|-------------------|-----------------|------------|-----------------|-------------------|-----------------|-------------------|-----------------|-------------------|
|                                                | Cluster group 1 |                   | Cluster group 2 |                   | Cluster group 3 |            | Cluster group 4 |                   | Cluster group 5 |                   | Cluster group 6 |                   |
|                                                | 1               |                   | 2               |                   | 3               |            | 4               |                   | 5               |                   | 6               |                   |
|                                                | (n = 1740)      |                   | (n = 590)       |                   | (n = 484)       |            | (n = 1478)      |                   | (n = 130)       |                   | (n = 310)       |                   |
|                                                | OR              | 95% CI            | OR              | 95% CI            | OR              | 95% CI     | OR              | 95% CI            | OR              | 95% CI            | OR              | 95% CI            |
| Education level                                |                 |                   |                 |                   |                 |            |                 |                   |                 |                   |                 |                   |
| Elementary ( $\leq 9$ years)                   | 1.00            | ref               | 1.00            | ref               | 1.00            | ref        | 1.00            | ref               | 1.00            | ref               | 1.00            | ref               |
| High school (10-12 years)                      | 0.90            | 0.57, 1.43        | 0.52            | 0.23, 1.18        | 0.92            | 0.45, 1.88 | 1.47            | 0.91, 2.37        | 0.56            | 0.17, 1.89        | 1.14            | 0.54, 2.40        |
| University/college ( $>12$ years)              | 1.09            | 0.64, 1.87        | <b>0.28</b>     | <b>0.10, 0.81</b> | 0.96            | 0.39, 2.38 | 1.54            | 0.87, 2.71        | 0.56            | 0.11, 2.93        | 0.46            | 0.12, 1.72        |
| Degree of urbanization                         |                 |                   |                 |                   |                 |            |                 |                   |                 |                   |                 |                   |
| Cities (densely populated areas)               | 1.00            | ref               | 1.00            | ref               | 1.00            | ref        | 1.00            | ref               | 1.00            | ref               | 1.00            | ref               |
| Towns and suburbs (intermediate density areas) | 0.97            | 0.72, 1.32        | 1.62            | 0.91, 2.88        | 0.92            | 0.51, 1.66 | 1.03            | 0.73, 1.46        | 1.61            | 0.45, 5.79        | <b>0.39</b>     | <b>0.16, 0.98</b> |
| Rural areas (thinly populated areas)           | 0.76            | 0.52, 1.13        | 1.42            | 0.70, 2.87        | 1.01            | 0.49, 2.06 | 1.22            | 0.78, 1.90        | 2.22            | 0.40, 12.45       | 0.52            | 0.21, 1.27        |
| Married                                        |                 |                   |                 |                   |                 |            |                 |                   |                 |                   |                 |                   |
| No                                             | 1.00            | ref               | 1.00            | ref               | 1.00            | ref        | 1.00            | ref               | 1.00            | ref               | 1.00            | ref               |
| Yes                                            | <b>1.47</b>     | <b>1.17, 1.84</b> | 0.71            | 0.48, 1.06        | 1.12            | 0.73, 1.72 | <b>0.75</b>     | <b>0.59, 0.96</b> | 0.34            | 0.12, 0.93        | 1.05            | 0.55, 1.99        |
| 36-45 years old DZ twins                       |                 |                   |                 |                   |                 |            |                 |                   |                 |                   |                 |                   |
|                                                | Cluster group 1 |                   | Cluster group 2 |                   | Cluster group 3 |            | Cluster group 4 |                   | Cluster group 5 |                   | Cluster group 6 |                   |
|                                                | 1               |                   | 2               |                   | 3               |            | 4               |                   | 5               |                   | 6               |                   |
|                                                | (n = 2362)      |                   | (n = 766)       |                   | (n = 574)       |            | (n = 1848)      |                   | (n = 202)       |                   | (n = 456)       |                   |
| Education level                                |                 |                   |                 |                   |                 |            |                 |                   |                 |                   |                 |                   |
| Elementary ( $\leq 9$ years)                   | 1.00            | ref               | 1.00            | ref               | 1.00            | ref        | 1.00            | ref               | 1.00            | ref               | 1.00            | ref               |
| High school (10-12 years)                      | 1.15            | 0.84, 1.59        | 1.01            | 0.65, 1.58        | 1.28            | 0.71, 2.29 | 1.29            | 0.91, 1.82        | <b>0.16</b>     | <b>0.05, 0.56</b> | 0.75            | 0.43, 1.29        |
| University/college ( $>12$ years)              | <b>2.43</b>     | <b>1.66, 3.55</b> | 0.58            | 0.32, 1.04        | 1.02            | 0.51, 2.06 | 0.87            | 0.58, 1.31        | <b>0.06</b>     | <b>0.01, 0.29</b> | <b>0.30</b>     | <b>0.14, 0.64</b> |
| Degree of urbanization                         |                 |                   |                 |                   |                 |            |                 |                   |                 |                   |                 |                   |
| Cities (densely populated areas)               | 1.00            | ref               | 1.00            | ref               | 1.00            | ref        | 1.00            | ref               | 1.00            | ref               | 1.00            | ref               |
| Towns and suburbs (intermediate density areas) | 0.92            | 0.71, 1.19        | 0.91            | 0.56, 1.49        | 1.25            | 0.73, 2.15 | 1.18            | 0.89, 1.56        | 1.21            | 0.47, 3.10        | 0.67            | 0.36, 1.25        |
| Rural areas (thinly populated areas)           | <b>0.63</b>     | <b>0.46, 0.88</b> | 1.35            | 0.75, 2.42        | 1.16            | 0.61, 2.22 | 1.31            | 0.92, 1.86        | 2.82            | 0.61, 12.98       | 1.07            | 0.53, 2.15        |
| Married                                        |                 |                   |                 |                   |                 |            |                 |                   |                 |                   |                 |                   |
| No                                             | 1.00            | ref               | 1.00            | ref               | 1.00            | ref        | 1.00            | ref               | 1.00            | ref               | 1.00            | ref               |
| Yes                                            | <b>1.42</b>     | <b>1.17, 1.71</b> | <b>0.61</b>     | <b>0.43, 0.87</b> | 0.72            | 0.49, 1.05 | 0.97            | 0.79, 1.19        | <b>0.35</b>     | <b>0.16, 0.77</b> | 0.98            | 0.65, 1.47        |

**Table S3.** Conditional odds ratios (OR) with 95% confidence intervals (CI) for associations between sociodemographic factors and sequence clusters among monozygotic (MZ) and dizygotic (DZ) twins in the age cohort 46-55 years.

| 46-55 years old MZ twins                       |                 |                   |                 |            |                 |                   |                 |                   |                 |                   |                 |                   |
|------------------------------------------------|-----------------|-------------------|-----------------|------------|-----------------|-------------------|-----------------|-------------------|-----------------|-------------------|-----------------|-------------------|
|                                                | Cluster group 1 |                   | Cluster group 2 |            | Cluster group 3 |                   | Cluster group 4 |                   | Cluster group 5 |                   | Cluster group 6 |                   |
|                                                | (n = 1896)      |                   | (n = 1800)      |            | (n = 480)       |                   | (n = 484)       |                   | (n = 526)       |                   | (n = 170)       |                   |
|                                                | OR              | 95% CI            | OR              | 95% CI     | OR              | 95% CI            | OR              | 95% CI            | OR              | 95% CI            | OR              | 95% CI            |
| Education level                                |                 |                   |                 |            |                 |                   |                 |                   |                 |                   |                 |                   |
| Elementary (≤9 years)                          | 1.00            | ref               | 1.00            | ref        | 1.00            | ref               | 1.00            | ref               | 1.00            | ref               | 1.00            | ref               |
| High school (10-12 years)                      | 0.87            | 0.62, 1.21        | 1.33            | 0.94, 1.86 | 0.68            | 0.33, 1.39        | 0.62            | 0.35, 1.09        | 1.46            | 0.77, 2.79        | 1.57            | 0.54, 4.54        |
| University/college (>12 years)                 | 0.96            | 0.63, 1.47        | 1.47            | 0.94, 2.29 | <b>0.37</b>     | <b>0.14, 0.98</b> | 0.48            | 0.20, 1.14        | 1.10            | 0.48, 2.55        | 2.30            | 0.49, 10.67       |
| Degree of urbanization                         |                 |                   |                 |            |                 |                   |                 |                   |                 |                   |                 |                   |
| Cities (densely populated areas)               | 1.00            | ref               | 1.00            | ref        | 1.00            | ref               | 1.00            | ref               | 1.00            | ref               | 1.00            | ref               |
| Towns and suburbs (intermediate density areas) | 1.17            | 0.88, 1.55        | 0.85            | 0.63, 1.15 | 0.88            | 0.49, 1.57        | 0.80            | 0.44, 1.46        | 1.11            | 0.64, 1.94        | 1.02            | 0.34, 3.12        |
| Rural areas (thinly populated areas)           | 0.73            | 0.50, 1.08        | 1.21            | 0.82, 1.79 | 0.82            | 0.41, 1.67        | 0.92            | 0.46, 1.86        | 1.20            | 0.61, 2.34        | 2.62            | 0.87, 7.83        |
| Married                                        |                 |                   |                 |            |                 |                   |                 |                   |                 |                   |                 |                   |
| No                                             | 1.00            | ref               | 1.00            | ref        | 1.00            | ref               | 1.00            | ref               | 1.00            | ref               | 1.00            | ref               |
| Yes                                            | 1.20            | 0.97, 1.49        | 0.94            | 0.75, 1.17 | 0.87            | 0.57, 1.33        | 0.79            | 0.51, 1.24        | 0.85            | 0.56, 1.28        | 1.24            | 0.57, 2.70        |
| 46-55 years old DZ twins                       |                 |                   |                 |            |                 |                   |                 |                   |                 |                   |                 |                   |
|                                                | Cluster group 1 |                   | Cluster group 2 |            | Cluster group 3 |                   | Cluster group 4 |                   | Cluster group 5 |                   | Cluster group 6 |                   |
|                                                | (n = 3356)      |                   | (n = 2930)      |            | (n = 820)       |                   | (n = 918)       |                   | (n = 878)       |                   | (n = 250)       |                   |
| Education level                                |                 |                   |                 |            |                 |                   |                 |                   |                 |                   |                 |                   |
| Elementary (≤9 years)                          | 1.00            | ref               | 1.00            | ref        | 1.00            | ref               | 1.00            | ref               | 1.00            | ref               | 1.00            | ref               |
| High school (10-12 years)                      | 1.06            | 0.86, 1.31        | 1.12            | 0.90, 1.39 | 1.05            | 0.73, 1.52        | 0.76            | 0.53, 1.10        | 1.19            | 0.79, 1.80        | 0.64            | 0.28, 1.47        |
| University/college (>12 years)                 | 1.68            | 1.29, 2.18        | 1.03            | 0.79, 1.35 | 0.64            | 0.38, 1.06        | <b>0.31</b>     | <b>0.18, 0.52</b> | 0.97            | 0.57, 1.64        | <b>0.22</b>     | <b>0.07, 0.68</b> |
| Degree of urbanization                         |                 |                   |                 |            |                 |                   |                 |                   |                 |                   |                 |                   |
| Cities (densely populated areas)               | 1.00            | ref               | 1.00            | ref        | 1.00            | ref               | 1.00            | ref               | 1.00            | ref               | 1.00            | ref               |
| Towns and suburbs (intermediate density areas) | 1.04            | 0.84, 1.29        | 1.21            | 0.96, 1.52 | 0.65            | 0.42, 1.03        | 0.82            | 0.55, 1.24        | 0.94            | 0.61, 1.45        | 1.24            | 0.44, 3.53        |
| Rural areas (thinly populated areas)           | 1.08            | 0.84, 1.39        | 1.14            | 0.88, 1.49 | 0.65            | 0.40, 1.05        | 0.69            | 0.43, 1.10        | 0.97            | 0.58, 1.63        | 2.36            | 0.75, 7.39        |
| Married                                        |                 |                   |                 |            |                 |                   |                 |                   |                 |                   |                 |                   |
| No                                             | 1.00            | ref               | 1.00            | ref        | 1.00            | ref               | 1.00            | ref               | 1.00            | ref               | 1.00            | ref               |
| Yes                                            | <b>1.57</b>     | <b>1.36, 1.82</b> | 1.03            | 0.88, 1.20 | <b>0.64</b>     | <b>0.46, 0.88</b> | <b>0.53</b>     | <b>0.40, 0.70</b> | <b>0.54</b>     | <b>0.40, 0.71</b> | 0.72            | 0.40, 1.30        |

**Table S4.** Conditional odds ratios (OR) with 95% confidence intervals (CI) for associations between sociodemographic factors and sequence clusters among monozygotic (MZ) and dizygotic (DZ) twins in the age cohort 56-65 years.

| 56-65 years old MZ twins                       |                 |                   |                 |                   |                 |                   |                 |                   |                 |                   |                 |                   |
|------------------------------------------------|-----------------|-------------------|-----------------|-------------------|-----------------|-------------------|-----------------|-------------------|-----------------|-------------------|-----------------|-------------------|
|                                                | Cluster group 1 |                   | Cluster group 2 |                   | Cluster group 3 |                   | Cluster group 4 |                   | Cluster group 5 |                   | Cluster group 6 |                   |
|                                                | (n = 2284)      |                   | (n = 1944)      |                   | (n = 828)       |                   | (n = 926)       |                   | (n = 242)       |                   | (n = 440)       |                   |
|                                                | OR              | 95% CI            |
| Education level                                |                 |                   |                 |                   |                 |                   |                 |                   |                 |                   |                 |                   |
| Elementary ( $\leq 9$ years)                   | 1.00            | ref               |
| High school (10-12 years)                      | 0.77            | 0.59, 1.01        | 1.16            | 0.87, 1.55        | 0.74            | 0.49, 1.11        | 1.51            | 0.99, 2.31        | 0.81            | 0.39, 1.69        | <b>1.91</b>     | <b>1.02, 3.56</b> |
| University/college ( $>12$ years)              | 0.72            | 0.50, 1.03        | 1.12            | 0.76, 1.65        | 0.62            | 0.31, 1.25        | <b>2.10</b>     | <b>1.15, 3.85</b> | 0.55            | 0.15, 1.99        | <b>2.45</b>     | <b>1.08, 5.53</b> |
| Degree of urbanization                         |                 |                   |                 |                   |                 |                   |                 |                   |                 |                   |                 |                   |
| Cities (densely populated areas)               | 1.00            | ref               |
| Towns and suburbs (intermediate density areas) | 1.11            | 0.86, 1.44        | 0.94            | 0.71, 1.23        | 1.38            | 0.87, 2.20        | 0.67            | 0.44, 1.04        | 0.92            | 0.40, 2.12        | 1.01            | 0.55, 1.85        |
| Rural areas (thinly populated areas)           | 0.96            | 0.69, 1.34        | 0.89            | 0.62, 1.27        | 1.67            | 0.97, 2.87        | 0.62            | 0.36, 1.08        | 1.19            | 0.38, 3.75        | 1.70            | 0.73, 3.93        |
| Married                                        |                 |                   |                 |                   |                 |                   |                 |                   |                 |                   |                 |                   |
| No                                             | 1.00            | ref               |
| Yes                                            | 1.16            | 0.96, 1.42        | 0.94            | 0.76, 1.17        | 0.78            | 0.57, 1.07        | 0.98            | 0.71, 1.35        | 0.75            | 0.43, 1.29        | 1.23            | 0.79, 1.91        |
| 56-65 years old DZ twins                       |                 |                   |                 |                   |                 |                   |                 |                   |                 |                   |                 |                   |
|                                                | Cluster group 1 |                   | Cluster group 2 |                   | Cluster group 3 |                   | Cluster group 4 |                   | Cluster group 5 |                   | Cluster group 6 |                   |
|                                                | (n = 3756)      |                   | (n = 3764)      |                   | (n = 1628)      |                   | (n = 1404)      |                   | (n = 444)       |                   | (n = 700)       |                   |
| Education level                                |                 |                   |                 |                   |                 |                   |                 |                   |                 |                   |                 |                   |
| Elementary ( $\leq 9$ years)                   | 1.00            | ref               |
| High school (10-12 years)                      | 1.06            | 0.90, 1.26        | <b>1.32</b>     | <b>1.10, 1.58</b> | <b>0.62</b>     | <b>0.48, 0.79</b> | 0.83            | 0.62, 1.09        | 0.95            | 0.57, 1.57        | 1.17            | 0.81, 1.69        |
| University/college ( $>12$ years)              | 0.97            | 0.77, 1.21        | <b>2.02</b>     | <b>1.57, 2.60</b> | <b>0.34</b>     | <b>0.22, 0.51</b> | 0.80            | 0.54, 1.18        | 0.58            | 0.25, 1.34        | 0.86            | 0.50, 1.46        |
| Degree of urbanization                         |                 |                   |                 |                   |                 |                   |                 |                   |                 |                   |                 |                   |
| Cities (densely populated areas)               | 1.00            | ref               |
| Towns and suburbs (intermediate density areas) | 0.96            | 0.79, 1.16        | 1.04            | 0.84, 1.28        | 1.11            | 0.82, 1.51        | 0.89            | 0.64, 1.23        | 1.40            | 0.75, 2.60        | 0.95            | 0.59, 1.54        |
| Rural areas (thinly populated areas)           | 0.88            | 0.70, 1.10        | 1.03            | 0.80, 1.31        | 1.16            | 0.82, 1.64        | 1.03            | 0.72, 1.49        | 1.27            | 0.61, 2.67        | 0.97            | 0.57, 1.63        |
| Married                                        |                 |                   |                 |                   |                 |                   |                 |                   |                 |                   |                 |                   |
| No                                             | 1.00            | ref               |
| Yes                                            | <b>1.16</b>     | <b>1.00, 1.34</b> | <b>1.40</b>     | <b>1.19, 1.63</b> | <b>0.50</b>     | <b>0.40, 0.63</b> | 0.92            | 0.73, 1.17        | <b>0.37</b>     | <b>0.23, 0.59</b> | 1.20            | 0.87, 1.66        |
